# Supplementary material
Source: bioRxiv or medRxiv preprint supplement (https://medrxiv.org/highwire/filestream/71320/field_highwire_adjunct_files/0/2020.01.15.20017665-1.pdf)
Supplement: Supplementary file [file 2020.01.15.20017665-1.pdf]

## **Motor cortex beta oscillations reflect motor skill learning ability after stroke**

Svenja Espenhahn, Holly E Rossiter, Bernadette CM van Wijk, Nell Redman, Jane M Rondina,  
Joern Diedrichsen, Nick S Ward

**Supplementary Material**

## **Methods**

### *Clinical assessment*

Stroke-related impairment was evaluated using the following standardized measures: the Action Research Arm Test (ARAT; 0–57) (Yozbatiran *et al.*, 2008), the Nine-Hole-Peg Test (NHPT; time to place 9 pegs into 9 holes) (Mathiowetz *et al.*, 1985b) and grip strength using a dynamometer (Mathiowetz *et al.*, 1985a). All scores were normalized to values of the unaffected arm of each patient. Since sensory loss is common after stroke (Tyson *et al.*, 2008), patients' tactile sensitivity was tested using the Fugl-Meyer (FM) (Fugl-Meyer *et al.*, 1975) sensation and passive joint motion scale (0–12). In order to create a compound impairment score unaffected by floor and ceiling effects in individual scores (Ward *et al.*, 2003; Rossiter *et al.*, 2014), a principle component analysis (PCA) was performed on all measures (a lower PCA score corresponds to greater impairment).

Cognitive functioning was assessed using the Sustained Attention to Response Test (SART; max error score 225). To control for the effect of fatigue and sleep, patients completed computerised versions of the Fatigue Severity Scale 7 (FSS-7; 0–7) (Krupp *et al.*, 1989; Johansson *et al.*, 2014), the Neurological Fatigue Index (NFI; 0–7) (Mills *et al.*, 2012)) and the St. Mary's Hospital sleep questionnaire (adapted from (Ellis *et al.*, 1981)) for the nights preceding testing. In order to generate a fatigue severity score, a PCA was performed on FSS and NFI ratings (lower PCA scores reflect lower levels of fatigue).

1 **Supplementary Table 1: Stroke patient characteristics.**

| Age | Sex | Months since stroke | Lesion side | Affected hand | Suspected stroke etiology | ARAT | NHPT | Grip strength | Tactile sensitivity | FSS-7 | NFI |
|-----|-----|---------------------|-------------|---------------|---------------------------|------|------|---------------|---------------------|-------|-----|
| 74  | F   | 136                 | R           | ND (L)        | LACI                      | 100  | 91   | 97            | 12                  | 3.7   | 2.2 |
| 71  | M   | 41                  | R           | ND (L)        | LACI                      | 100  | 77   | 92            | 12                  | 2.8   | 1.5 |
| 57  | M   | 80                  | R           | ND (L)        | anterior thalamus         | 100  | 97   | 93            | 12                  | 1.6   | 1.8 |
| 50  | M   | 43                  | L           | D (R)         | posterior MCA             | 98   | 68   | 89            | 12                  | 6.1   | 2.5 |
| 63  | M   | 122                 | L           | D (R)         | striatocapsular           | 100  | 91   | 90            | 12                  | 3.6   | 1.8 |
| 63  | M   | 70                  | L           | D (R)         | LACI                      | 100  | 102  | 116           | 11                  | 5.0   | 3.0 |
| 63  | F   | 44                  | R           | ND (L)        | frontal lobe              | 100  | 95   | 67            | 12                  | -3.1  | 2.9 |
| 71  | M   | 220                 | R           | ND (L)        | LACI                      | 96   | 50   | 67            | 11                  | 4.0   | 2.5 |
| 56  | M   | 49                  | R           | ND (L)        | thalamus                  | 100  | 95   | 76            | 10                  | 2.9   | 2.2 |
| 63  | F   | 71                  | L           | AD (L)        | LACI                      | 100  | 96   | 55            | 12                  | 2.7   | 2.5 |
| 60  | M   | 42                  | L           | D (R)         | anterior MCA              | 100  | 86   | 104           | 11                  | 2.6   | 2.8 |
| 73  | M   | 128                 | L           | D (R)         | LACI                      | 100  | 89   | 87            | 12                  | 3.9   | 2.4 |
| 71  | F   | 57                  | R           | ND (L)        | LACI                      | 100  | 124  | 39            | 12                  | 4.4   | 2.6 |
| 75  | F   | 136                 | L           | D (R)         | PCA                       | 100  | 94   | 54            | 12                  | 3.9   | 2.0 |
| 56  | M   | 83                  | R           | ND L)         | hypothalamus              | 100  | 89   | 57            | 12                  | 3.7   | 3.0 |
| 58  | F   | 105                 | L           | D (R)         | anterior MCA              | 100  | 107  | 24            | 10                  | 4.4   | 3.0 |

2 *M: Male; F: Female; R: Right; L: Left; ND: Non-dominant; D: Dominant; AD: Ambidextrous; LACI: Lacunar infarct; MCA: Middle*  
3 *cerebral artery; PCA: Posterior cerebral artery; ARAT: Action Research Arm Test; NHPT: Nine Hole Peg Test in peg/s; FSS-7: Fatigue*  
4 *Severity Scale; NFI: Neurological Fatigue Index*

5  
6

7 *Individual target velocity*

8 Prior to the training, the average velocity with which the target moved along the arc was  
9 individually determined in order to ensure that the task was of equal difficulty for everyone at the  
10 beginning of the training and left enough room for improvement in performance. For this purpose,  
11 we implemented an adaptive staircase procedure, which, on any given trial, adjusted  
12 (increased/decreased) the target velocity dependent on the subject's preceding performance until  
13 a pre-specified criterion range was reached. On average, patients reached the criterion in  $15.5 \pm 5.1$   
14 trials and the number of trials required was comparable to the control subjects ( $t_{(1,34)}=0.96$ ,  
15  $p=0.082$ ). The individually determined target velocity with which subjects were subsequently  
16 trained on the continuous tracking task was applied to all sessions. Of note, the target velocity with  
17 which patients were trained (mean velocity  $\pm$ SD =  $45.38 \pm 5.22$  deg/s) was significantly slower  
18 compared to the control group (mean velocity  $\pm$ SD =  $51.28 \pm 9.43$  deg/s) [ $t_{(34)}=-2.24$ ,  $p=0.032$ ].

19

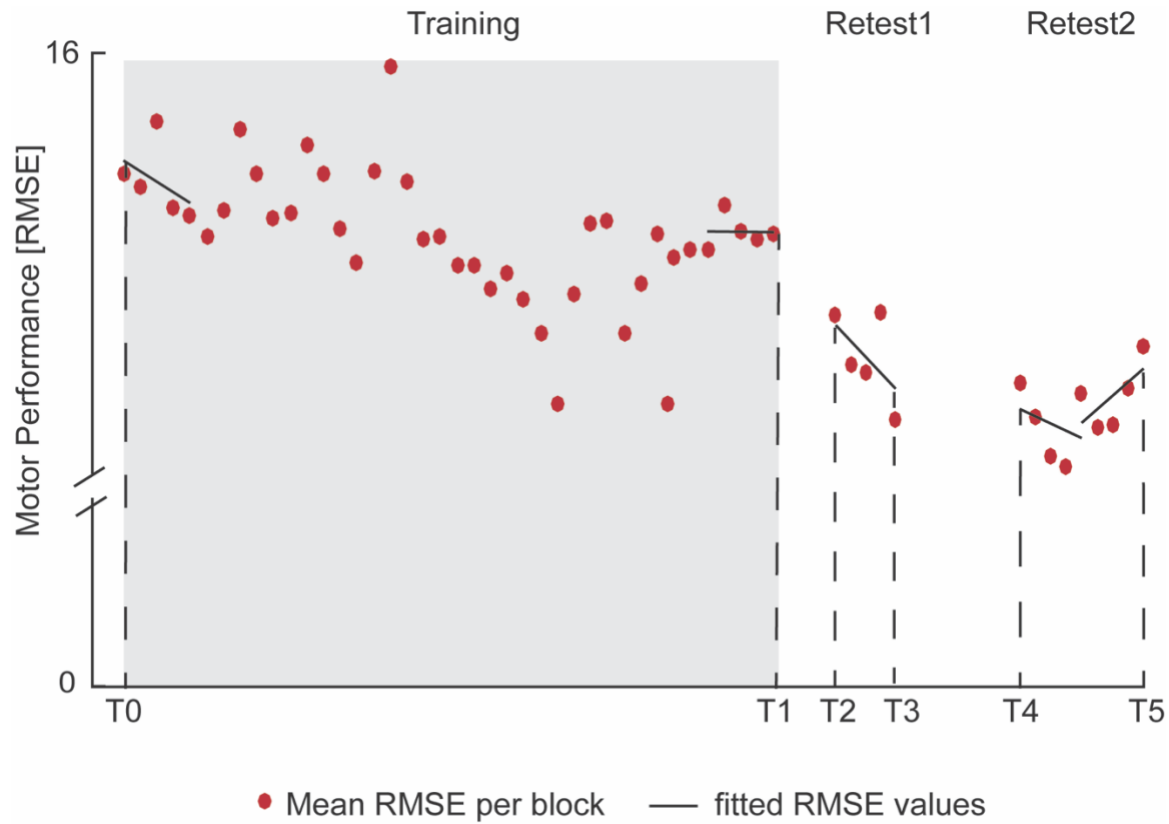

20

21 **Supplementary Figure 1:** Linear regression approach for exemplary patient. Dots represent  
 22 individual blocks of an example patient during training and retest sessions of repeated sequence  
 23 only. Black lines represent linear regression models across 5 blocks at the beginning and end of  
 24 individual sessions. Corrected performance estimates were derived from these linear regression  
 25 models at six different time points ( $T_0$  = first block of training,  $T_1$  = last block of training,  $T_2$  =  
 26 first block of retest1,  $T_3$  = last block of retest1,  $T_4$  = first block of retest2, and  $T_5$  = last block of  
 27 retest2) and used to subsequently assess changes in performance with training.

28

29

30 **Supplementary Table 2:** Potential predictors of performance at  $T_2$  and  $T_4$  included in the  
 31 regression approach with LOOCV.

|                                         | Performance at T2 | Performance at T4 |
|-----------------------------------------|-------------------|-------------------|
| <b>Pre-training beta power measures</b> |                   |                   |
| Pre-BBc                                 | ◆                 | ◆                 |
| Pre-BBi                                 | ◆                 | ◆                 |
| Pre-MRBDC                               | ◆                 | ◆                 |

|                                          |   |   |
|------------------------------------------|---|---|
| Pre-MRBDi                                | ◆ | ◆ |
| Pre-PMBRc                                | ◆ | ◆ |
| Pre-PMBRi                                | ◆ | ◆ |
| <b>Post-training beta power measures</b> |   | ◆ |
| Post1-BBc                                | ◆ | ◆ |
| Post1-BBi                                | ◆ | ◆ |
| Post1-MRBDc                              | ◆ | ◆ |
| Post1-MRBDi                              | ◆ | ◆ |
| Post1-PMBRc                              | ◆ | ◆ |
| Post1-PMBRi                              | ◆ | ◆ |
| Post2-BBc                                |   | ◆ |
| Post2-BBi                                |   | ◆ |
| Post2-MRBDc                              |   | ◆ |
| Post2-MRBDi                              |   | ◆ |
| Post2-PMBRc                              |   | ◆ |
| Post2-PMBRi                              |   | ◆ |
| <b>Motor performance at</b>              |   |   |
| T0                                       | ◆ | ◆ |
| T1                                       | ◆ | ◆ |
| T2                                       |   | ◆ |
| T3                                       |   | ◆ |
| <b>Demographic information</b>           |   |   |
| Age                                      | ◆ | ◆ |
| Motor function                           | ◆ | ◆ |
| Cognitive function                       | ◆ | ◆ |
| Sleep characteristics                    | ◆ | ◆ |

---

33 **Supplementary Table 3: ANOVA results of patients' motor performance at different time points**  
 34 **during the motor learning process relative to controls.**

| Group                                                          | Time                                             | Sequence Type                                    | Interactions                                          |
|----------------------------------------------------------------|--------------------------------------------------|--------------------------------------------------|-------------------------------------------------------|
| <b>Performance changes across initial training</b>             |                                                  |                                                  |                                                       |
| T0 vs T1                                                       |                                                  |                                                  | <b>time x group:</b>                                  |
| $F_{(1,33)}=0.01,$<br>$p=0.330$                                | $F_{(1,34)}=9.69,$<br>$p=0.004, \eta_p^2=0.222$  | $F_{(1,34)}=15.73,$<br>$p<0.001, \eta_p^2=0.316$ | $F_{(1,34)}=6.70,$<br>$P=0.014,$<br>$\eta_p^2=0.165$  |
|                                                                |                                                  |                                                  | <b>time x sequence:</b>                               |
|                                                                |                                                  |                                                  | $F_{(1,34)}=16.74,$<br>$p<0.001,$<br>$\eta_p^2=0.330$ |
| <b>Performance changes after time delay (retest1, retest2)</b> |                                                  |                                                  |                                                       |
| T1 vs T2                                                       |                                                  |                                                  | <b>sequence x group:</b>                              |
| $F_{(1,34)}=5.84,$<br>$p=0.021,$<br>$\eta_p^2=0.147$           | $F_{(1,34)}=20.96,$<br>$p<0.001, \eta_p^2=0.381$ | $F_{(1,34)}=48.79,$<br>$p<0.001, \eta_p^2=0.589$ | $F_{(1,34)}=4.39,$<br>$P=0.044,$<br>$\eta_p^2=0.114$  |
| T3 vs T4                                                       |                                                  |                                                  | <b>sequence x group:</b>                              |
| $F_{(1,34)}=6.84,$<br>$p=0.013,$<br>$\eta_p^2=0.167$           | $F_{(1,34)}=8.41,$<br>$p=0.006, \eta_p^2=0.198$  | $F_{(1,34)}=44.83,$<br>$p<0.001, \eta_p^2=0.569$ | $F_{(1,34)}=5.56,$<br>$p=0.024,$<br>$\eta_p^2=0.140$  |
|                                                                |                                                  |                                                  | <b>time x sequence:</b>                               |
|                                                                |                                                  |                                                  | $F_{(1,34)}=9.07,$<br>$p=0.005,$<br>$\eta_p^2=0.211$  |
| <b>Overall performance changes</b>                             |                                                  |                                                  |                                                       |
| T0 vs T2                                                       |                                                  |                                                  | <b>time x group:</b>                                  |
|                                                                |                                                  |                                                  | $F_{(1,34)}=9.61,$                                    |

$F_{(1,34)}=1.03,$        $F_{(1,34)}=50.39,$        $F_{(1,34)}=20.49,$        $p=0.004,$   
 $p=0.317$        $p<0.001, \eta_p^2=0.597$        $p<0.001, \eta_p^2=0.376$        $\eta_p^2=0.220$

*time x sequence:*

$F_{(1,34)}=29.53,$   
 $P<0.001,$   
 $\eta_p^2=0.465$

T0 vs T4

*time x group:*

$F_{(1,34)}=1.30,$        $F_{(1,34)}=56.25,$        $F_{(1,34)}=6.99,$        $F_{(1,34)}=10.33,$   
 $p=0.262$        $p<0.001, \eta_p^2=0.623$        $p=0.012, \eta_p^2=0.171$        $p=0.003,$   
 $\eta_p^2=0.233$

*time x sequence:*

$F_{(1,34)}=12.74,$   
 $P=0.001,$   
 $\eta_p^2=0.273$

---

*Significant effects are indicated in bold. T0: beginning of training session; T1: end of training session; T2: beginning of retest1; T3: end of retest1; T4: beginning of retest2.*

35  
36  
37

**Supplementary Table 4: ANOVA results for spectral power measures**

| Group                           | Hemisphere                                                                  | Session                                                                                        | Interactions |
|---------------------------------|-----------------------------------------------------------------------------|------------------------------------------------------------------------------------------------|--------------|
| BB                              |                                                                             |                                                                                                |              |
| $F_{(1,34)}=0.21,$<br>$p=0.653$ | $F_{(1,34)}=1.80,$<br>$p=0.188$                                             | <b><math>F_{(2,68)}=5.90,</math></b><br><b><math>p=0.004, \eta_p^2=0.148</math></b>            | n.s.         |
| MRBD                            |                                                                             |                                                                                                |              |
| $F_{(1,34)}=2.22,$<br>$p=0.146$ | <b><math>F_{(1,34)}=21.06,</math></b><br><b><math>\eta_p^2=0.383</math></b> | $p<0.001,$ <b><math>F_{(2,68)}=5.94,</math></b><br><b><math>p=0.004, \eta_p^2=0.149</math></b> | n.s.         |



PMBR

$F_{(1,34)}=0.31$ ,  $F_{(1,34)}=7.25$ ,  $p=0.011$ ,  $F_{(2,68)}=3.29$ , n.s.  
 $p=0.576$   $\eta_p^2=0.176$   $p=0.043$ ,  $\eta_p^2=0.088$

---

*Significant effects are indicated in bold. BB: Pre-movement baseline beta; MRBD: Movement-Related Beta Desynchronization; PMBR: Post-Movement Beta Rebound; n.s.: not significant.*
